# Supplementary material for: Cholesterol as an Endogenous Ligand of ERRα Promotes ERRα-Mediated Cellular Proliferation and Metabolic Target Gene Expression in Breast Cancer Cells
Source: PubMed Central journal article supplement (PMC7463712; doi:10.3390/cells9081765), 2020-07-23
Supplement: cells-09-01765-s001.pdf [file cells-09-01765-s001.pdf]

Table S1. The primer sequences used for qPCR

| Target Gene |   | Sequence: 5' to 3'      |
|-------------|---|-------------------------|
| SOD2        | F | CTGGACAAACCTCAGCCCTAAC  |
|             | R | AACCTGAGCCTTGGACACCAAC  |
| IDH3A       | F | TCGGTGTGACACCAAGTGGCAA  |
|             | R | TTCGCCATGTCCTTGCCTGCAA  |
| VEGF        | F | TTGCCTTGCTGCTCTACCTCCA  |
|             | R | GATGGCAGTAGCTGCGCTGATA  |
| PDK4        | F | AGGTGGAGCATTCTCGCGCTA   |
|             | R | GAATGTTGGCGAGTCTCACAGG  |
| SPP1        | F | CGAGGTGATAGTGTGGTTTATGG |
|             | R | GCACCATTCAACTCCTCGCTTTC |
| GSTM1       | F | TGATGTCCTTGACCTCCACCGT  |
|             | R | GCTGGACTTCATGTAGGCAGAG  |
| ERR1        | F | CCACTATGGTGTGGCATCCTGT  |
|             | R | GGTGATCTCACACTCGTTGGAG  |
| PGC-1       | F | CAAAGGATGCGCTCTCGTTCA   |
|             | R | CGGTGTCTGTAGTGGCTTGACT  |
| GAPDH       | F | GTCTCCTCTGACTTCAACAGCG  |
|             | R | ACCACCCTGTTGCTGTAGCCAA  |
